# Supplementary material for: Enhancement of weak ferromagnetism, exotic structure prediction and diverse electronic properties in holmium substituted multiferroic bismuth ferrite
Source: Royal Society of Chemistry journal article supplement (doi:10.1039/d3cp03259k), 2023-01-01
Supplement: d3cp03259k1.pdf [file d3cp03259k1.pdf]

## **Enhancement of weak ferromagnetism, exotic structure prediction and diverse electronic properties in holmium substituted multiferroic bismuth ferrite**

Maria Čebela<sup>1,2,3\*</sup>, Dejan Zagorac<sup>2,3\*</sup>, Igor Popov<sup>4,5\*</sup>, Filip Torić<sup>1</sup>, Teodoro Klaser<sup>6</sup>, Željko Skoko<sup>1</sup>, Damir Pajić<sup>1\*</sup>

<sup>1</sup> University of Zagreb, Faculty of Science, Department of Physics, Bijenička cesta 32, 10000 Zagreb, Croatia

<sup>2</sup> Materials Science Laboratory, Institute of Nuclear Sciences Vinča, University of Belgrade, National Institute of the Republic of Serbia, Mike Petrovića Alasa 12-14, Belgrade, Serbia

<sup>3</sup> Center of Excellence “CextremeLab”, Institute of Nuclear Sciences Vinča, University of Belgrade, National Institute of the Republic of Serbia, Mike Petrovića Alasa 12-14, Belgrade, Serbia

<sup>4</sup> Institute for Multidisciplinary Research, University of Belgrade, Kneza Višeslava 1, 11030 Belgrade, Serbia

<sup>5</sup> Institute of Physics, University of Belgrade, Pregrevica 118, 11080 Belgrade, Serbia

<sup>6</sup> Ruđer Bošković Institute, Bijenička cesta 54, 10000 Zagreb, Croatia

Corresponding Authors: [mcebela@vinca.rs](mailto:mcebela@vinca.rs) , [dzagorac@vinca.rs](mailto:dzagorac@vinca.rs) , [popov@ipb.ac.rs](mailto:popov@ipb.ac.rs) , [dpajic@phy.hr](mailto:dpajic@phy.hr)

## **Supporting Information**

## Supporting Tables

**Table S1.** Structural parameters of the samples doped with 2%, 5% and 10% Ho studied by powder X-ray diffraction and the data were refined by the Rietveld method.

|                            | BHFO-2                                                     | BHFO-5                                                     | BHFO-10                                                    |
|----------------------------|------------------------------------------------------------|------------------------------------------------------------|------------------------------------------------------------|
| Empirical formula          | $\text{Bi}_{5.88}\text{Ho}_{0.12}\text{Fe}_6\text{O}_{12}$ | $\text{Bi}_{5.70}\text{Ho}_{0.30}\text{Fe}_6\text{O}_{12}$ | $\text{Bi}_{5.40}\text{Ho}_{0.60}\text{Fe}_6\text{O}_{12}$ |
| Crystal system             | Trigonal (hexagonal axes)                                  | Trigonal (hexagonal axes)                                  | Trigonal (hexagonal axes)                                  |
| Space group                | $R3c$                                                      | $R3c$                                                      | $R3c$                                                      |
| $a/\text{\AA}$             | 5.6082(7)                                                  | 5.5870(6)                                                  | 5.5800(7)                                                  |
| $c/\text{\AA}$             | 13.9253(9)                                                 | 13.8873(8)                                                 | 13.8739(8)                                                 |
| Agreement parameters       |                                                            |                                                            |                                                            |
| $R_{\text{wp}}/\%$         | 10.3                                                       | 14.1                                                       | 11.2                                                       |
| $R_{\text{p}}/\%$          | 8.1                                                        | 11.9                                                       | 9.8                                                        |
| $R_{\text{exp}}/\%$        | 7.1                                                        | 10.2                                                       | 8.1                                                        |
| Refined atomic coordinates |                                                            |                                                            |                                                            |
| O (x)                      | 0.438(3)                                                   | 0.441(3)                                                   | 0.445(3)                                                   |
| (y)                        | 0.016(2)                                                   | 0.015(2)                                                   | 0.019(3)                                                   |
| (z)                        | 0.948(5)                                                   | 0.943(4)                                                   | 0.951(5)                                                   |
| Bi/Ho (z)                  | 0.223(1)                                                   | 0.228(2)                                                   | 0.226(1)                                                   |

**Table S2.** Calculated values of the global instability index (GII) and tilt system of the most promising  $\text{Bi}_{0.98}\text{Ho}_{0.02}\text{FeO}_3$  modifications using the bond valence (BVC) method.

| Modification                                          | Space group   | Tilt system | GII     |
|-------------------------------------------------------|---------------|-------------|---------|
| $\beta\text{-Bi}_{0.98}\text{Ho}_{0.02}\text{FeO}_3$  | <i>Pnma</i>   | $a^-b^+a^-$ | 0.03816 |
| $R\text{-Bi}_{0.98}\text{Ho}_{0.02}\text{FeO}_3$      | <i>R-3c</i>   | $a^-a^-a^-$ | 0.04284 |
| $T_1\text{-Bi}_{0.98}\text{Ho}_{0.02}\text{FeO}_3$    | <i>P4/mbm</i> | $a^0a^0c^-$ | 0.08938 |
| $T_2\text{-Bi}_{0.98}\text{Ho}_{0.02}\text{FeO}_3$    | <i>I4/mcm</i> | $a^0a^0c^-$ | 0.08938 |
| $\gamma\text{-Bi}_{0.98}\text{Ho}_{0.02}\text{FeO}_3$ | <i>Pm-3m</i>  | $a^0a^0a^0$ | 0.72910 |

**Table S3.** Structural data of the most promising  $\text{Bi}_{0.98}\text{Ho}_{0.02}\text{FeO}_3$  perovskite modifications calculated using the BVC method.

| Modification, space group and Wyckoff position                                                                                                                | Cell parameters(Å), unit-cell volume (Å <sup>3</sup> ) and fractional coordinates                                                         |
|---------------------------------------------------------------------------------------------------------------------------------------------------------------|-------------------------------------------------------------------------------------------------------------------------------------------|
| $\beta\text{-Bi}_{0.98}\text{Ho}_{0.02}\text{FeO}_3$<br><i>Pnma</i> (62)<br>Bi 4 <i>c</i><br>Ho 4 <i>c</i><br>Fe 4 <i>b</i><br>O1 4 <i>c</i><br>O2 8 <i>d</i> | $a=5.60, b=7.76, c=5.39$<br>$V=234.55$<br>0.5599 1/4 0.5207<br>0.5599 1/4 0.5207<br>1/2 0 0<br>-0.0181 1/4 0.4013<br>0.2958 0.0494 0.7006 |
| $R\text{-Bi}_{0.98}\text{Ho}_{0.02}\text{FeO}_3$<br>$\bar{R}3c$ (167)<br>Bi 6 <i>a</i><br>Ho 6 <i>a</i><br>Fe1 6 <i>b</i><br>O 18 <i>e</i>                    | $a=5.44, c=13.96$<br>$V=357.56$<br>0 0 1/4<br>0 0 1/4<br>2/3 1/3 1/3<br>0.4091 0 1/4                                                      |
| $T_1\text{-Bi}_{0.98}\text{Ho}_{0.02}\text{FeO}_3$<br><i>P4/mbm</i> (127)<br>Bi 2 <i>c</i><br>Ho 2 <i>c</i><br>Fe 2 <i>a</i><br>O1 2 <i>b</i>                 | $a=5.36, c=4.03$<br>$V=115.73$<br>0 1/2 1/2<br>0 1/2 1/2<br>0 0 0<br>0 0 1/2                                                              |

|                                                                  |                  |
|------------------------------------------------------------------|------------------|
| O2 4g                                                            | 0.1592 0.6592 0  |
| $T_2$ -Bi <sub>0.98</sub> Ho <sub>0.02</sub> FeO <sub>3</sub>    | $a=5.36, c=8.06$ |
| <i>I4/mcm</i> (140)                                              | $V=231.45$       |
| Bi 4b                                                            | 0 1/2 1/4        |
| Ho 4b                                                            | 0 1/2 1/4        |
| Fe 4c                                                            | 0 0 0            |
| O1 4a                                                            | 0 0 1/4          |
| O2 8h                                                            | 0.3408 0.8408 0  |
| $\gamma$ -Bi <sub>0.98</sub> Ho <sub>0.02</sub> FeO <sub>3</sub> | $a=4.03$         |
| <i>Pm-3m</i> (221)                                               | $V=65.50$        |
| Bi 1b                                                            | 1/2 1/2 1/2      |
| Ho 1b                                                            | 1/2 1/2 1/2      |
| Fe 1a                                                            | 0 0 0            |
| O 3d                                                             | 0 0 1/2          |

**Table S4.** Calculated values of the global instability index (GII) and tilt system of the most promising Bi<sub>0.95</sub>Ho<sub>0.05</sub>FeO<sub>3</sub> modifications using the bond valence (BVC) method.

| Modification                                                     | Space group   | Tilt system                                  | GII     |
|------------------------------------------------------------------|---------------|----------------------------------------------|---------|
| $\beta$ -Bi <sub>0.95</sub> Ho <sub>0.05</sub> FeO <sub>3</sub>  | <i>Pnma</i>   | a <sup>+</sup> b <sup>+</sup> a <sup>-</sup> | 0.05815 |
| <i>R</i> -Bi <sub>0.95</sub> Ho <sub>0.05</sub> FeO <sub>3</sub> | <i>R-3c</i>   | a <sup>-</sup> a <sup>-</sup> a <sup>-</sup> | 0.06113 |
| $T_1$ -Bi <sub>0.95</sub> Ho <sub>0.05</sub> FeO <sub>3</sub>    | <i>P4/mbm</i> | a <sup>0</sup> a <sup>0</sup> c <sup>-</sup> | 0.09992 |
| $T_2$ -Bi <sub>0.95</sub> Ho <sub>0.05</sub> FeO <sub>3</sub>    | <i>I4/mcm</i> | a <sup>0</sup> a <sup>0</sup> c <sup>-</sup> | 0.09992 |
| $\gamma$ -Bi <sub>0.95</sub> Ho <sub>0.05</sub> FeO <sub>3</sub> | <i>Pm-3m</i>  | a <sup>0</sup> a <sup>0</sup> a <sup>0</sup> | 0.73225 |

**Table S5.** Structural data of the most promising Bi<sub>0.95</sub>Ho<sub>0.05</sub>FeO<sub>3</sub> perovskite modifications calculated using the BVC method.

| Modification, space group and Wyckoff position                  | Cell parameters(Å), unit-cell volume (Å <sup>3</sup> ) and fractional coordinates |
|-----------------------------------------------------------------|-----------------------------------------------------------------------------------|
| $\beta$ -Bi <sub>0.95</sub> Ho <sub>0.05</sub> FeO <sub>3</sub> | $a=5.59, b=7.76, c=5.39$                                                          |
| <i>Pnma</i> (62)                                                | $V=234.33$                                                                        |
| Bi 4c                                                           | 0.5604 1/4 0.5209                                                                 |
| Ho 4c                                                           | 0.5604 1/4 0.5209                                                                 |
| Fe 4b                                                           | 1/2 0 0                                                                           |
| O1 4c                                                           | -0.0182 1/4 0.4008                                                                |
| O2 8d                                                           | 0.2960 0.0496 0.7004                                                              |

|                                                                                                                                                                |                                                                                                 |
|----------------------------------------------------------------------------------------------------------------------------------------------------------------|-------------------------------------------------------------------------------------------------|
| $R\text{-Bi}_{0.95}\text{Ho}_{0.05}\text{FeO}_3$<br><i>R-3c</i> (167)<br>Bi 6 <i>a</i><br>Ho 6 <i>a</i><br>Fe1 6 <i>b</i><br>O 18 <i>e</i>                     | $a=5.44, c=13.96$<br>$V=357.36$<br>0 0 1/4<br>0 0 1/4<br>2/3 1/3 1/3<br>0.5911 0 1/4            |
| $T_1\text{-Bi}_{0.95}\text{Ho}_{0.05}\text{FeO}_3$<br><i>P4/mbm</i> (127)<br>Bi 2 <i>c</i><br>Ho 2 <i>c</i><br>Fe 2 <i>a</i><br>O1 2 <i>b</i><br>O2 4 <i>g</i> | $a=5.36, c=4.03$<br>$V=115.63$<br>0 1/2 1/2<br>0 1/2 1/2<br>0 0 0<br>0 0 1/2<br>0.1589 0.6589 0 |
| $T_2\text{-Bi}_{0.95}\text{Ho}_{0.05}\text{FeO}_3$<br><i>I4/mcm</i> (140)<br>Bi 4 <i>b</i><br>Ho 4 <i>b</i><br>Fe 4 <i>c</i><br>O1 4 <i>a</i><br>O2 8 <i>h</i> | $a=5.36, c=8.06$<br>$V=231.25$<br>0 1/2 1/4<br>0 1/2 1/4<br>0 0 0<br>0 0 1/4<br>0.3411 0.8411 0 |
| $\gamma\text{-Bi}_{0.95}\text{Ho}_{0.05}\text{FeO}_3$<br><i>Pm-3m</i> (221)<br>Bi 1 <i>b</i><br>Ho 1 <i>b</i><br>Fe 1 <i>a</i><br>O 3 <i>d</i>                 | $a=4.03$<br>$V=65.50$<br>1/2 1/2 1/2<br>1/2 1/2 1/2<br>0 0 0<br>0 0 1/2                         |

**Table S6.** Calculated values of the global instability index (GII) and tilt system of the most promising  $\text{Bi}_{0.9}\text{Ho}_{0.1}\text{FeO}_3$  modifications using the bond valence (BVC) method.

| Modification                                        | Space group   | Tilt system | GII     |
|-----------------------------------------------------|---------------|-------------|---------|
| $\beta\text{-Bi}_{0.9}\text{Ho}_{0.1}\text{FeO}_3$  | <i>Pnma</i>   | $a^-b^+a^-$ | 0.08023 |
| $R\text{-Bi}_{0.9}\text{Ho}_{0.1}\text{FeO}_3$      | <i>R-3c</i>   | $a^-a^-a^-$ | 0.08226 |
| $T_1\text{-Bi}_{0.9}\text{Ho}_{0.1}\text{FeO}_3$    | <i>P4/mbm</i> | $a^0a^0c^-$ | 0.11480 |
| $T_2\text{-Bi}_{0.9}\text{Ho}_{0.1}\text{FeO}_3$    | <i>I4/mcm</i> | $a^0a^0c^-$ | 0.11480 |
| $\gamma\text{-Bi}_{0.9}\text{Ho}_{0.1}\text{FeO}_3$ | <i>Pm-3m</i>  | $a^0a^0a^0$ | 0.73746 |

**Table S7.** Structural data of the most promising Bi<sub>0.9</sub>Ho<sub>0.1</sub>FeO<sub>3</sub> perovskite modifications calculated using the BVC method.

| <b>Modification, space group and Wyckoff position</b>                                                                                                                                   | <b>Cell parameters(Å), unit-cell volume (Å<sup>3</sup>) and fractional coordinates</b>                                                                                |
|-----------------------------------------------------------------------------------------------------------------------------------------------------------------------------------------|-----------------------------------------------------------------------------------------------------------------------------------------------------------------------|
| <i>β</i> -Bi <sub>0.9</sub> Ho <sub>0.1</sub> FeO <sub>3</sub><br><i>Pnma</i> (62)<br>Bi 4 <i>c</i><br>Ho 4 <i>c</i><br>Fe 4 <i>b</i><br>O1 4 <i>c</i><br>O2 8 <i>d</i>                 | <i>a</i> =5.60, <i>b</i> =7.76, <i>c</i> =5.39<br><i>V</i> =233.93<br>0.5613 1/4 0.5212<br>0.5613 1/4 0.5212<br>1/2 0 0<br>-0.0185 1/4 0.4000<br>0.2963 0.0500 0.7000 |
| <i>R</i> -Bi <sub>0.9</sub> Ho <sub>0.1</sub> FeO <sub>3</sub><br><i>R-3c</i> (167)<br>Bi 6 <i>a</i><br>Ho 6 <i>a</i><br>Fe1 6 <i>b</i><br>O 18 <i>e</i>                                | <i>a</i> =5.43, <i>c</i> =13.96<br><i>V</i> =357.05<br>0 0 1/4<br>0 0 1/4<br>2/3 1/3 1/3<br>0.5916 0 1/4                                                              |
| <i>T</i> <sub>1</sub> -Bi <sub>0.9</sub> Ho <sub>0.1</sub> FeO <sub>3</sub><br><i>P4/mbm</i> (127)<br>Bi 2 <i>c</i><br>Ho 2 <i>c</i><br>Fe 2 <i>a</i><br>O1 2 <i>b</i><br>O2 4 <i>g</i> | <i>a</i> =5.35, <i>c</i> =4.03<br><i>V</i> =115.45<br>0 1/2 1/2<br>0 1/2 1/2<br>0 0 0<br>0 0 1/2<br>0.1583 0.6583 0                                                   |
| <i>T</i> <sub>2</sub> -Bi <sub>0.9</sub> Ho <sub>0.1</sub> FeO <sub>3</sub><br><i>I4/mcm</i> (140)<br>Bi 4 <i>b</i><br>Ho 4 <i>b</i><br>Fe 4 <i>c</i><br>O1 4 <i>a</i><br>O2 8 <i>h</i> | <i>a</i> =5.35, <i>c</i> =8.06<br><i>V</i> =230.91<br>0 1/2 1/4<br>0 1/2 1/4<br>0 0 0<br>0 0 1/4<br>0.3417 0.8417 0                                                   |
| <i>γ</i> -Bi <sub>0.9</sub> Ho <sub>0.1</sub> FeO <sub>3</sub><br><i>Pm-3m</i> (221)<br>Bi 1 <i>b</i><br>Ho 1 <i>b</i><br>Fe 1 <i>a</i><br>O 3 <i>d</i>                                 | <i>a</i> =4.03<br><i>V</i> =65.50<br>1/2 1/2 1/2<br>1/2 1/2 1/2<br>0 0 0<br>0 0 1/2                                                                                   |

## Supporting Figures

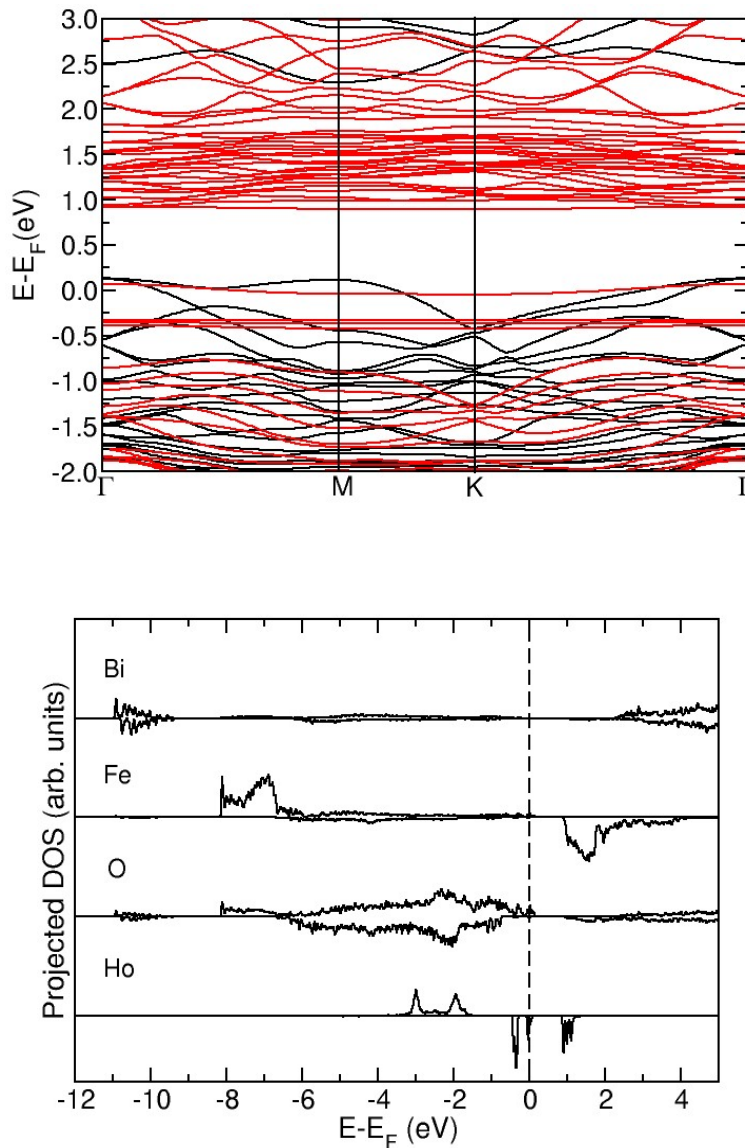

**Figure S1.** Electro-magnetic properties of the half-metallic **alpha FM** structure: a) Band structure along lines between high symmetry points. Black lines present spin-up and red line spin-down bands; b) Element-resolved density of states (DOS). Mirrored graphs correspond to spin-up and spin-down states. Alpha FM has a relatively small gap of  $\sim 0.9$  eV with an asymmetry of dispersion of valence (large dispersion) and conduction (small dispersion, flat band). Suitable for. e.g. application as a switch.

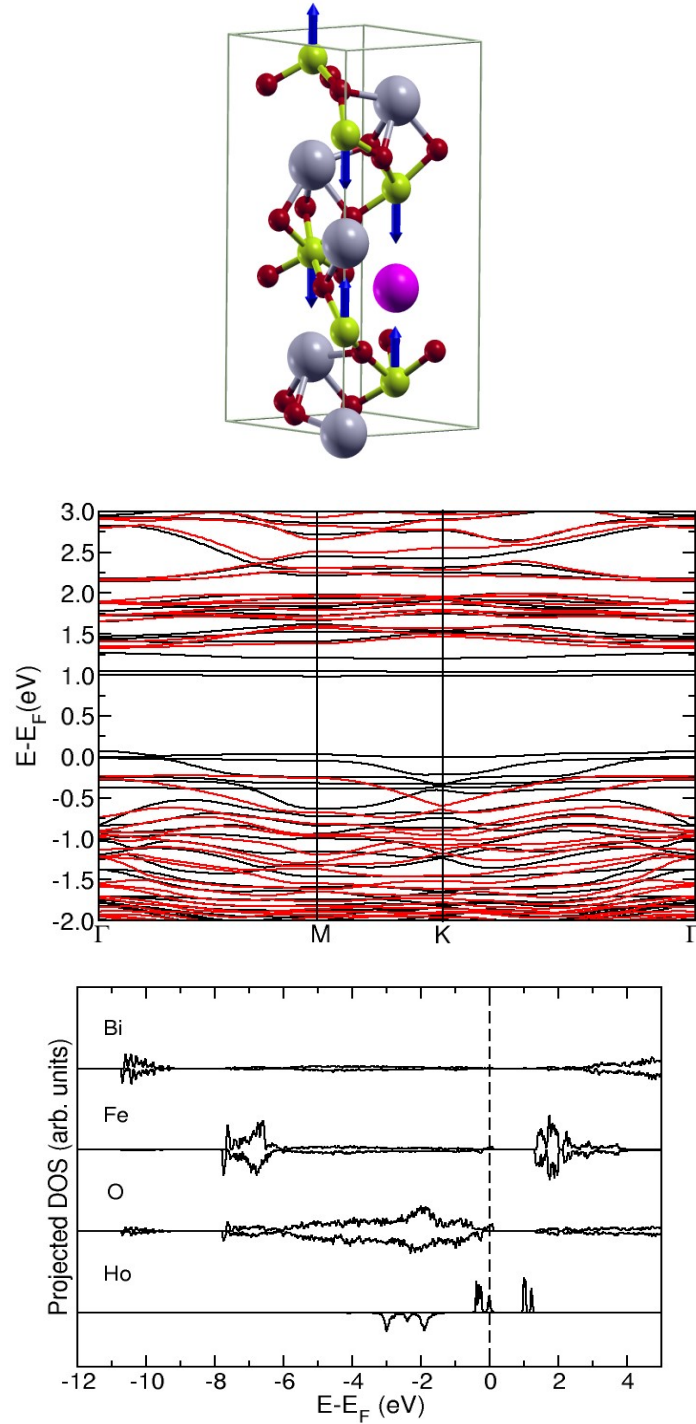

**Figure S2.** Electro-magnetic properties of the half-metallic **alpha AFM1** structure: a) Calculation cell with spin texture marked by the blue arrows; b) Band structure along lines between high symmetry points. Black lines present spin-up and red line spin-down bands; c) Element-resolved density of states (DOS). Mirrored graphs correspond to spin-up and spin-down states.



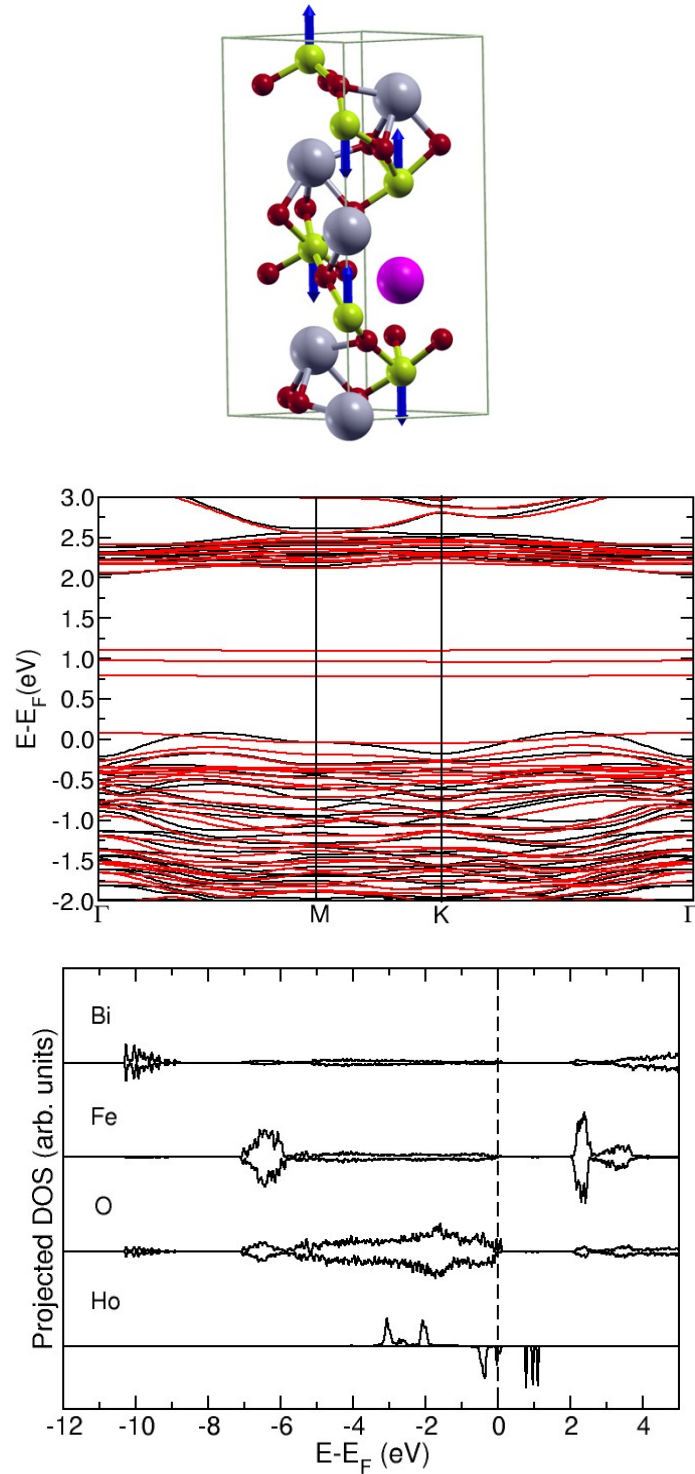

**Figure S3.** Electro-magnetic properties of the  **$\alpha$  AFM2** structure: a) Calculation cell with spin texture marked by the blue arrows; b) Band structure along lines between high symmetry points. Black lines present spin-up and red line spin-down bands; c) Element-resolved density of states (DOS). Mirrored graphs correspond to spin-up and spin-down states.

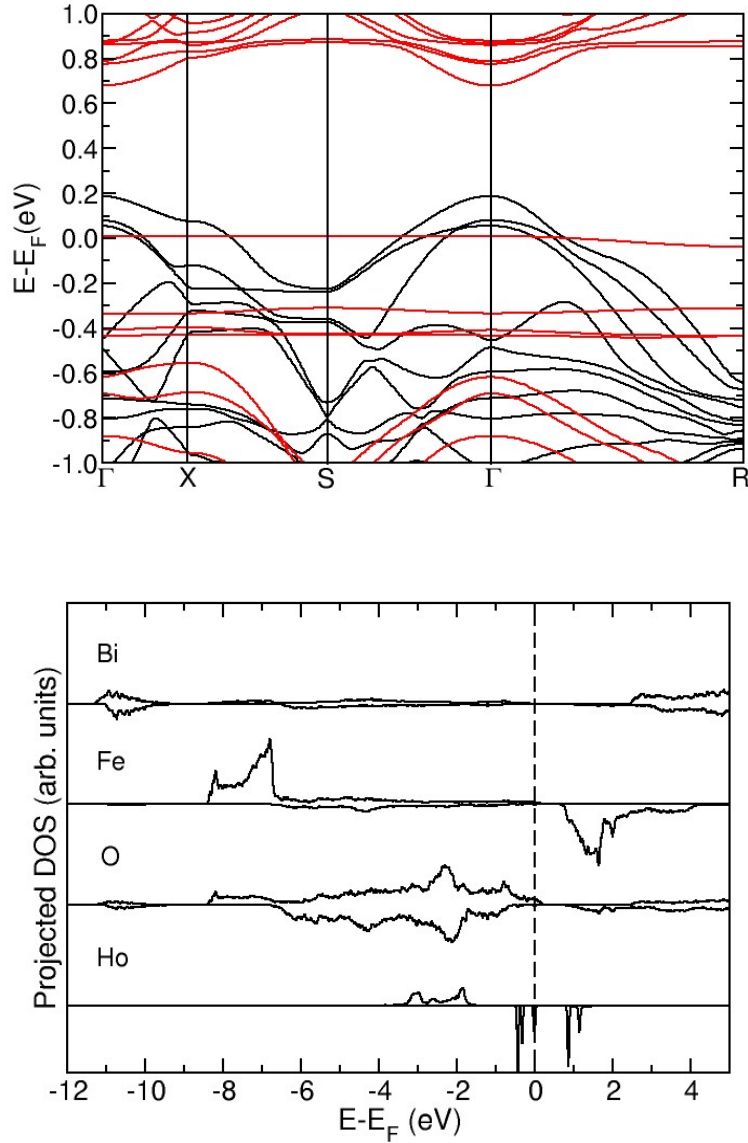

**Figure S4.** Electro-magnetic properties of the half-metallic **beta FM** structure: a) Band structure along lines between high symmetry points. Black lines present spin-up and red line spin-down bands; b) Element-resolved density of states (DOS). Mirrored graphs correspond to spin-up and spin-down states.

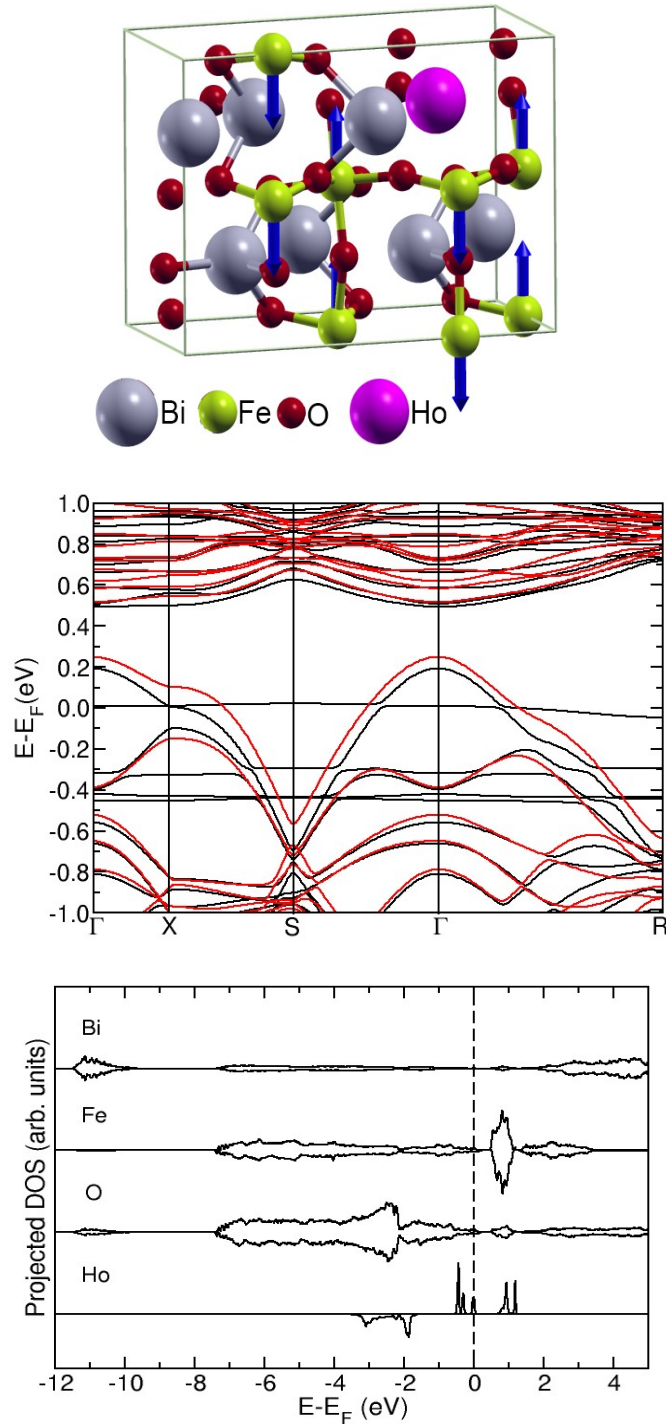

**Figure S5.** Electro-magnetic properties of the **beta AFM1** structure: a) Calculation cell with spin texture marked by the blue arrows; b) Band structure along lines between high symmetry points. Black lines present spin-up and red line spin-down bands; c) Element-resolved density of states (DOS). Mirrored graphs correspond to spin-up and spin-down states. Beta AFM1 has a dispersive valence band while the conduction band has a relatively small dispersion. This finding together with the small band gap indicates that beta AFM1 is suitable for application as a switch.

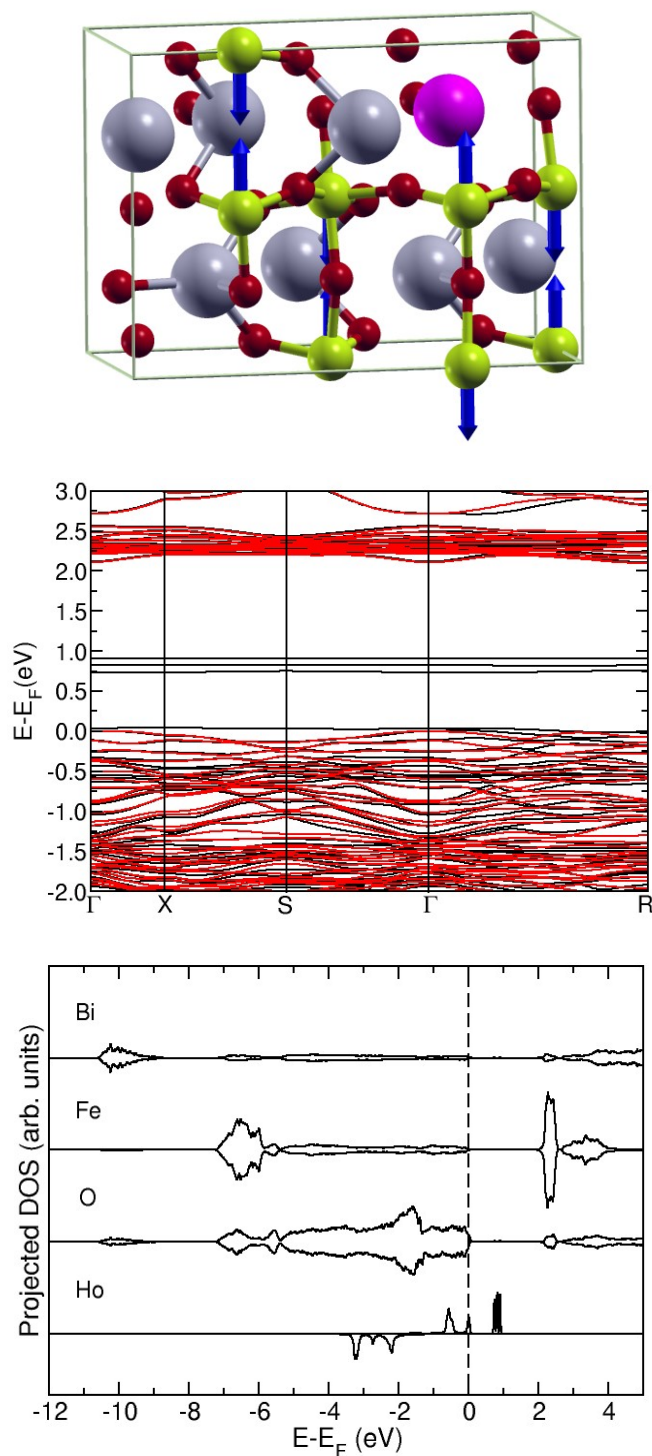

**Figure S6.** Electro-magnetic properties of the **beta AFM2** structure: a) Calculation cell with spin texture marked by the blue arrows; b) Band structure along lines between high symmetry points. Black lines present spin-up and red line spin-down bands; c) Element-resolved density of states (DOS). Mirrored graphs correspond to spin-up and spin-down states. Both beta AFM1 and AFM2 structures appear as semiconductors with beta AFM1 direct band gap of 0.2-1.70 eV and dispersion

of 1.70 eV, while beta AFM2 type shows a direct band gap of 2 eV and dispersion of valence bands of only 0.15 eV (Table 2 and supporting Figures).

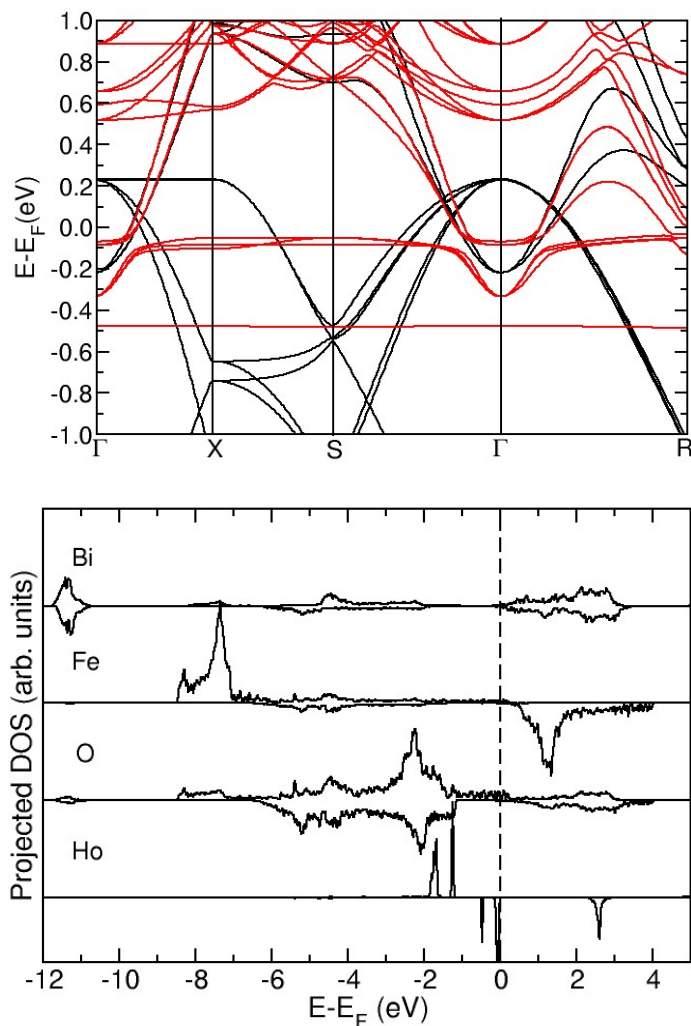

**Figure S7.** Electro-magnetic properties of the **gamma FM** structure: a) Band structure along lines between high symmetry points. Black lines present spin-up and red line spin-down bands; b) Element-resolved density of states (DOS). Mirrored graphs correspond to spin-up and spin-down states.

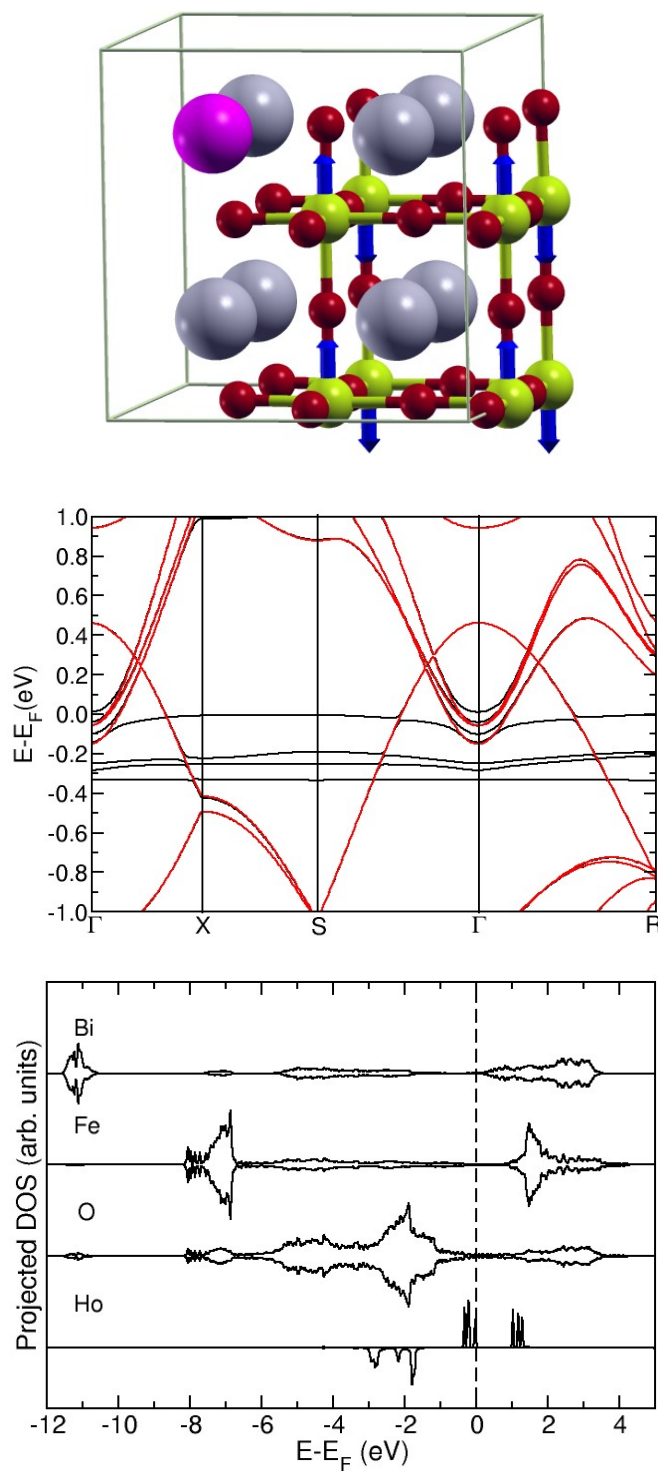

**Figure S8.** Electro-magnetic properties of the semimetallic  **$\gamma$  AFM1** structure: a) Calculation cell with spin texture marked by the blue arrows; b) Band structure along lines between high symmetry points. Black lines present spin-up and red line spin-down bands; c) Element-resolved density of states (DOS). Mirrored graphs correspond to spin-up and spin-down states.

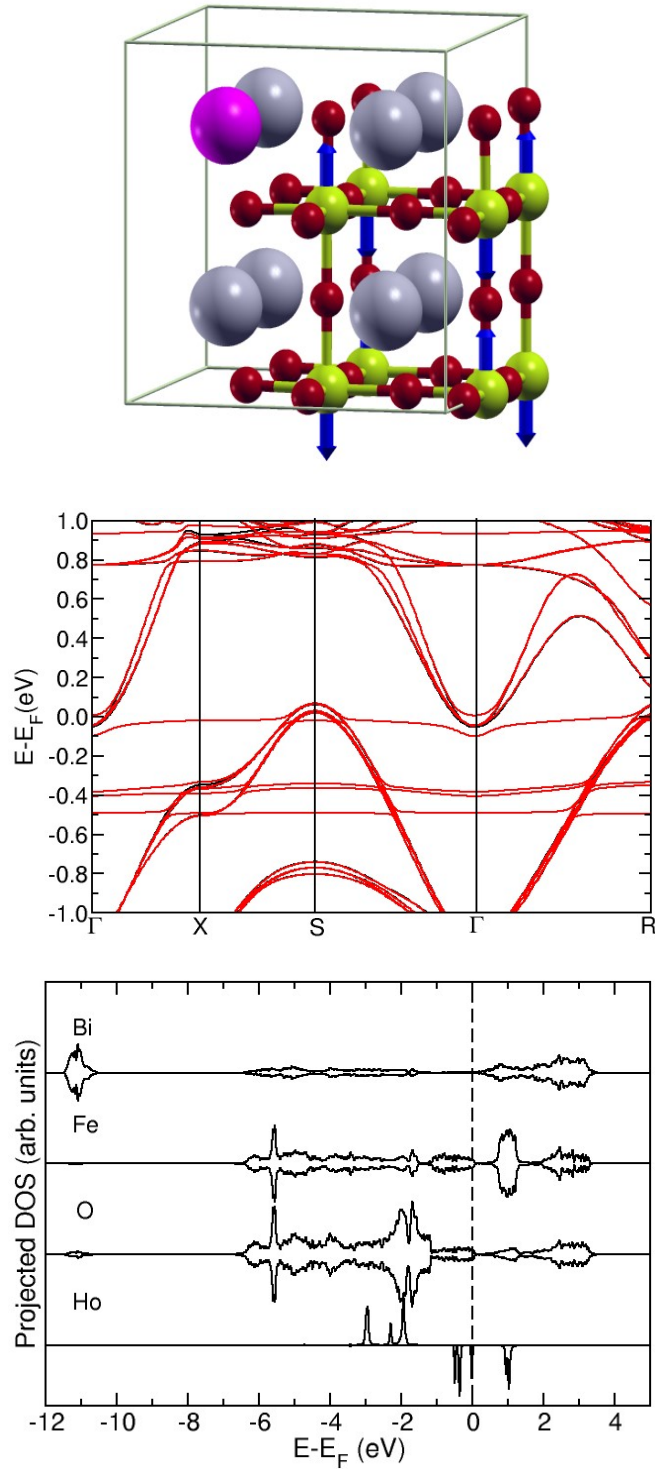

**Figure S9.** Electro-magnetic properties of the semimetallic  **$\gamma$  AFM2** structure: a) Calculation cell with spin texture marked by the blue arrows; b) Band structure along lines between high symmetry points. Black lines present spin-up and red line spin-down bands; c) Element-resolved density of states (DOS). Mirrored graphs correspond to spin-up and spin-down states.



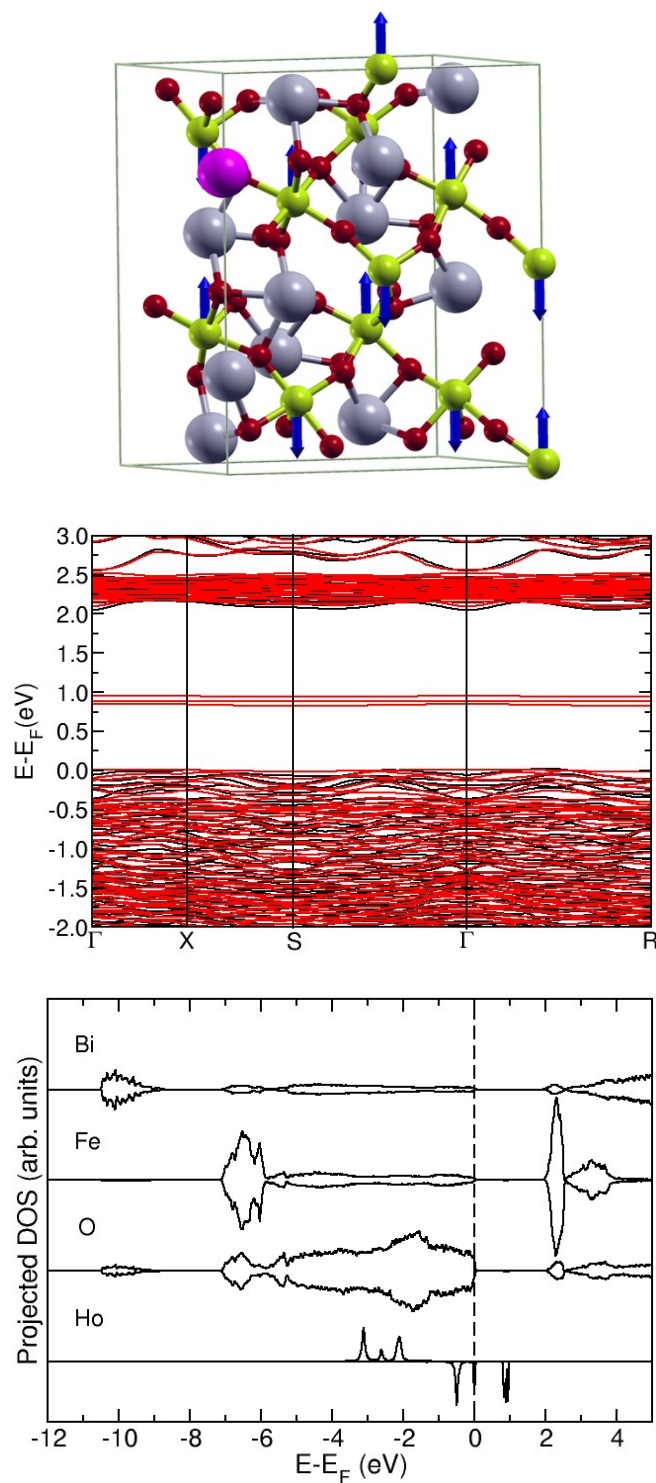

**Figure S9.** Electro-magnetic properties of the **R-type AFM1** structure: a) Calculation cell with spin texture marked by the blue arrows; b) Band structure along lines between high symmetry points. Black lines present spin-up and red line spin-down bands; c) Element-resolved density of states (DOS). Mirrored graphs correspond to spin-up and spin-down states.



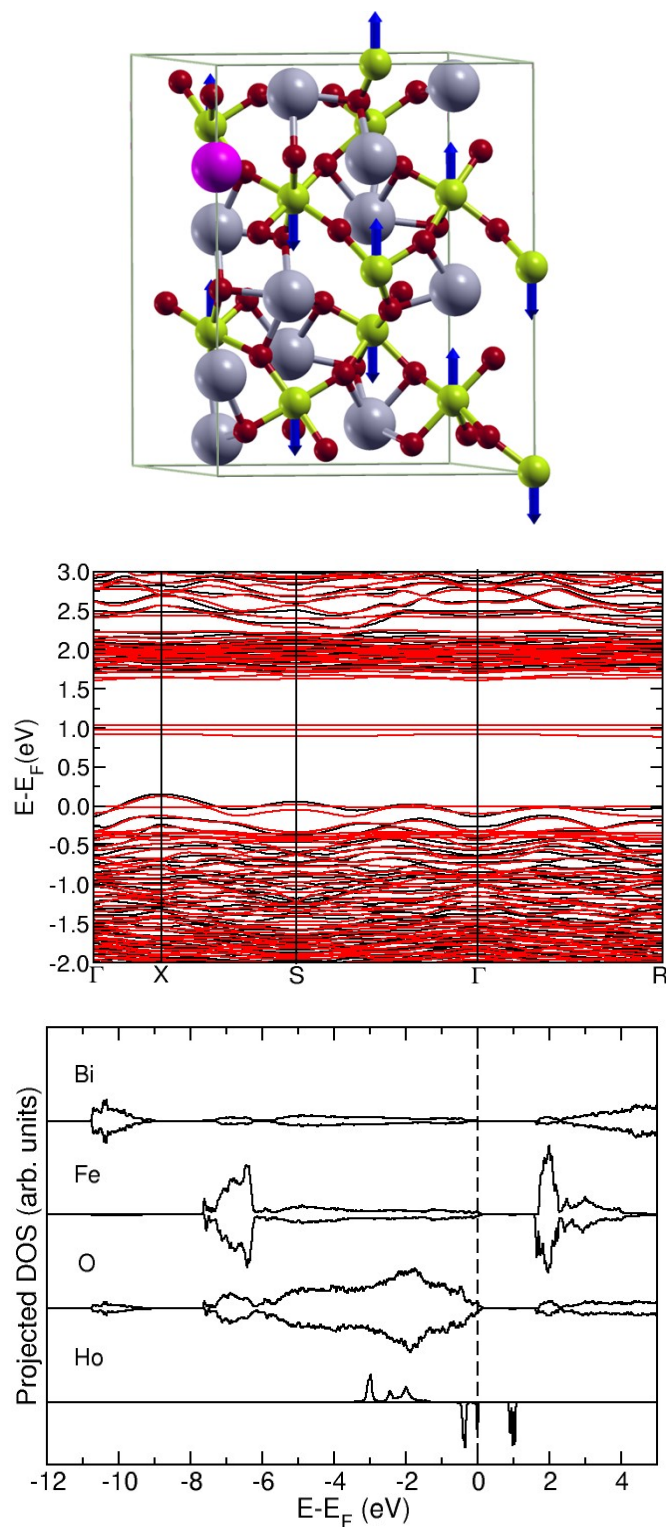

**Figure S10.** Electro-magnetic properties of the **R-type AFM2** structure: a) Calculation cell with spin texture marked by the blue arrows; b) Band structure along lines between high symmetry points. Black lines present spin-up and red line spin-down bands; c) Element-resolved density of states (DOS). Mirrored graphs correspond to spin-up and spin-down states.

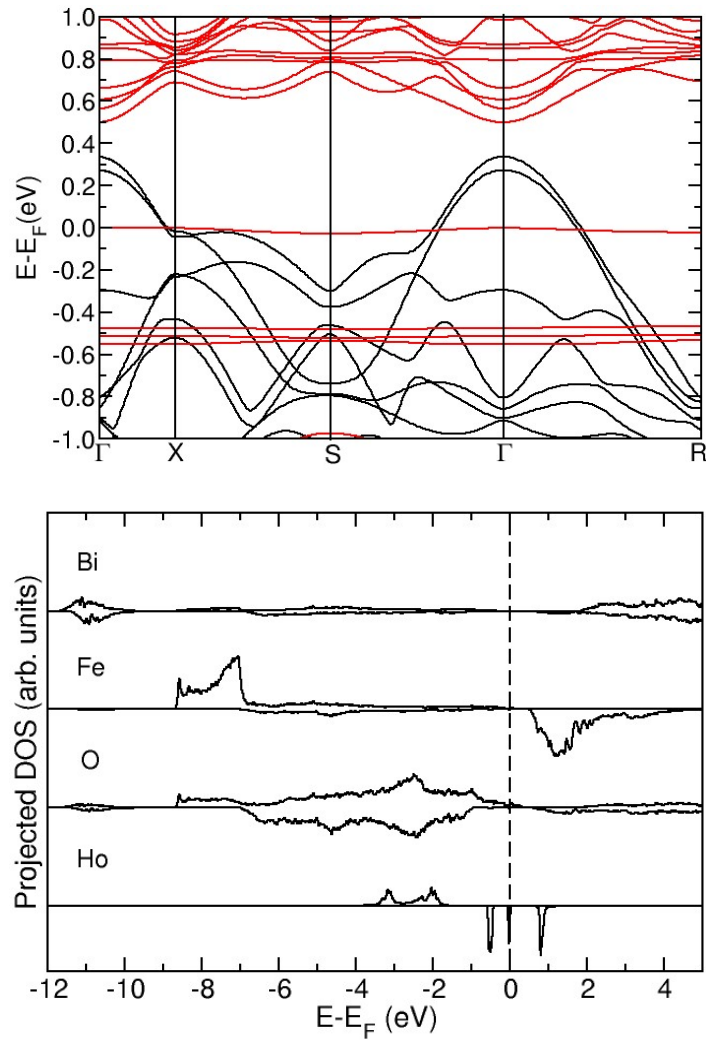

**Figure S11.** Electro-magnetic properties of the half-metallic **T1-type FM** structure: a) Band structure along lines between high symmetry points. Black lines present spin-up and red line spin-down bands; b) Element-resolved density of states (DOS). Mirrored graphs correspond to spin-up and spin-down states.

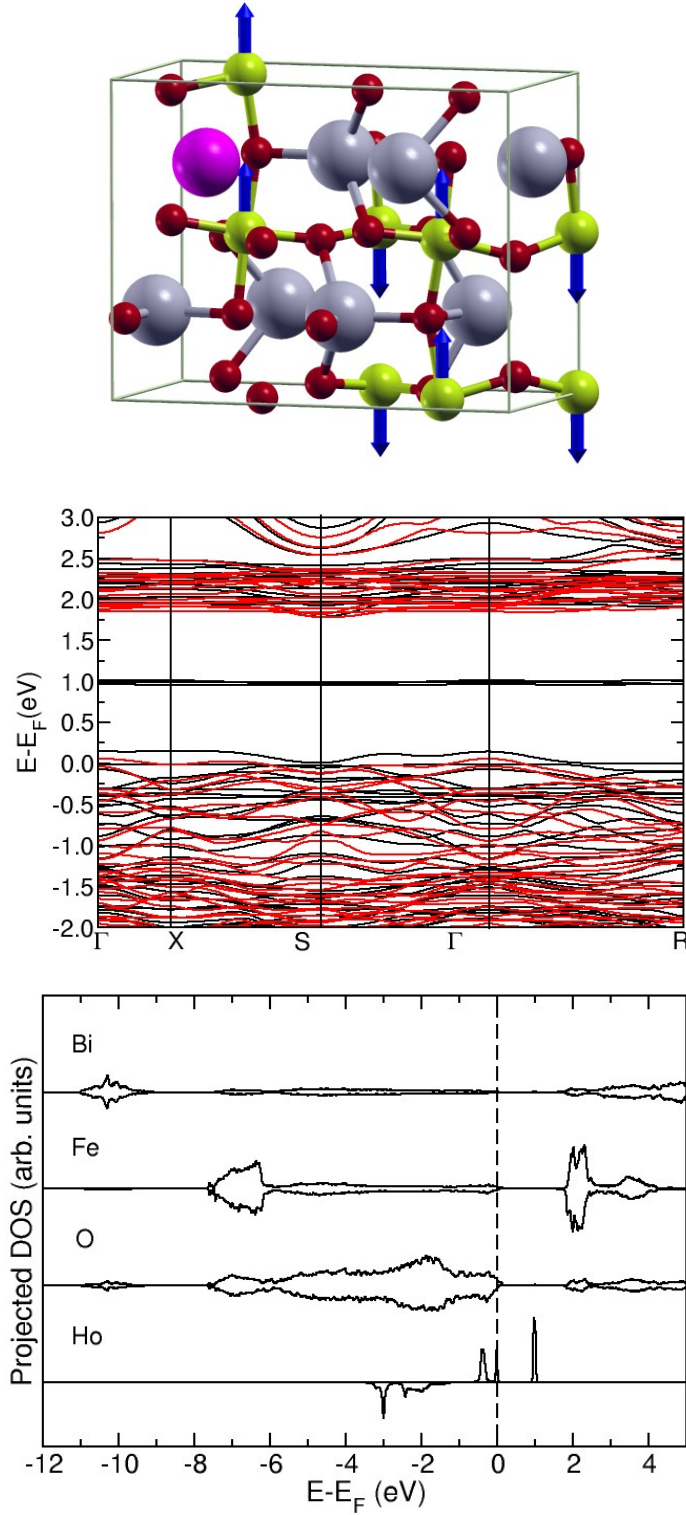

**Figure S12.** Electro-magnetic properties of the **T1-type AFM1** structure: a) Calculation cell with spin texture marked by the blue arrows; b) Band structure along lines between high symmetry points. Black lines present spin-up and red line spin-down bands; c) Element-resolved density of states (DOS). Mirrored graphs correspond to spin-up and spin-down states.

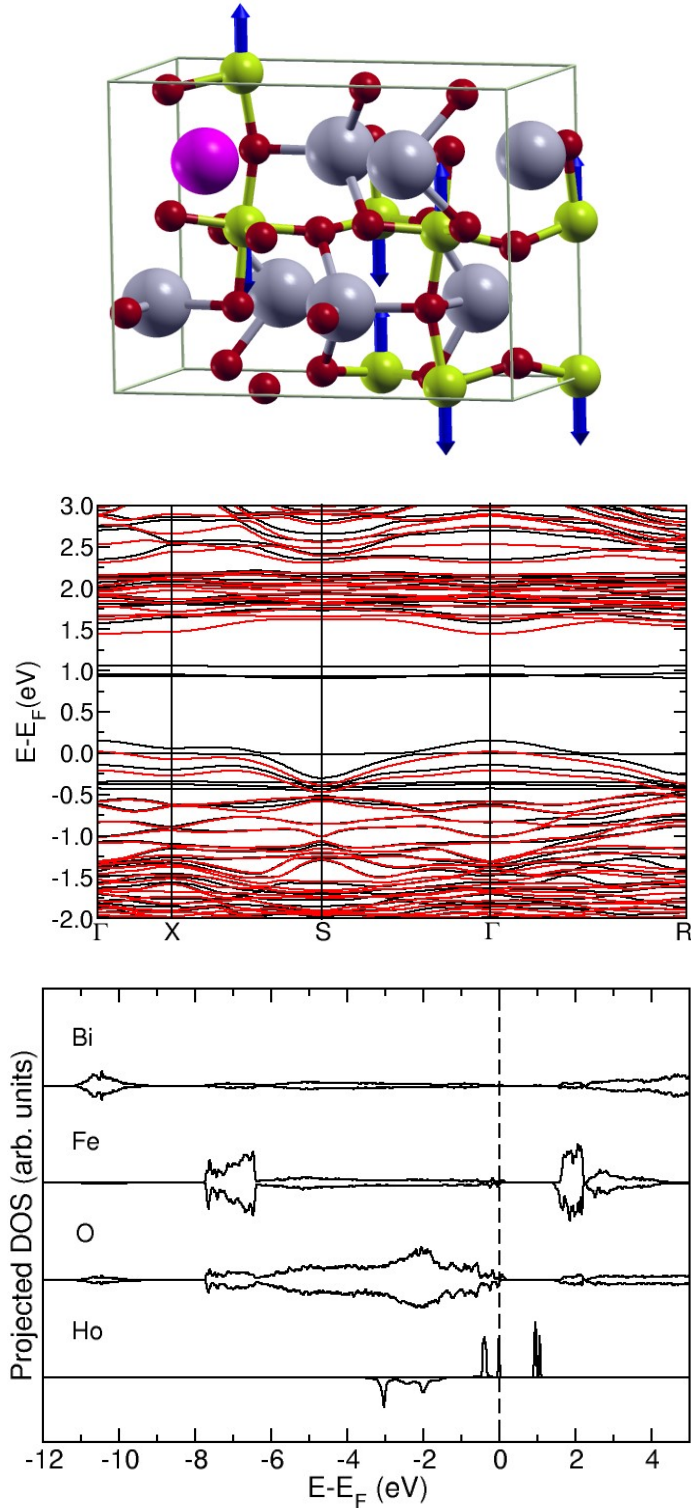

**Figure S13.** Electro-magnetic properties of the **T1-type AFM2** structure: a) Calculation cell with spin texture marked by the blue arrows; b) Band structure along lines between high symmetry points. Black lines present spin-up and red line spin-down bands; c) Element-resolved density of states (DOS). Mirrored graphs correspond to spin-up and spin-down states.

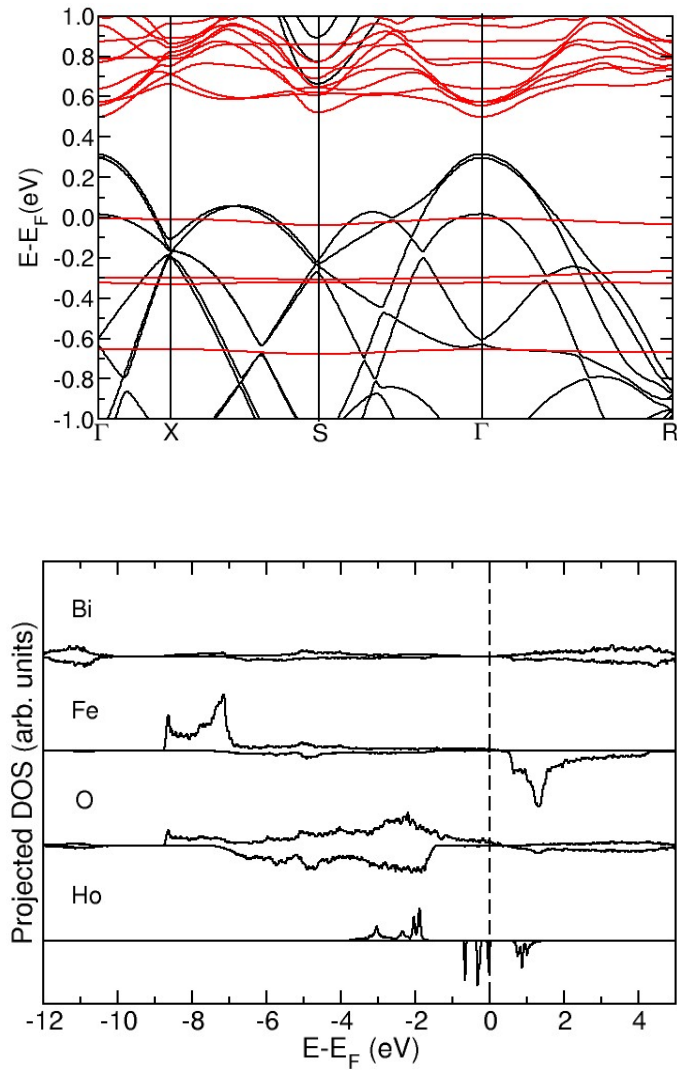

**Figure S14.** Electro-magnetic properties of the half-metallic **T2-type FM** structure: a) Band structure along lines between high symmetry points. Black lines present spin-up and red line spin-down bands; b) Element-resolved density of states (DOS). Mirrored graphs correspond to spin-up and spin-down states. T2 FM has a relatively large dispersion of the valence band and small dispersion of the conduction band, which is suitable for. e.g. application as a switch.

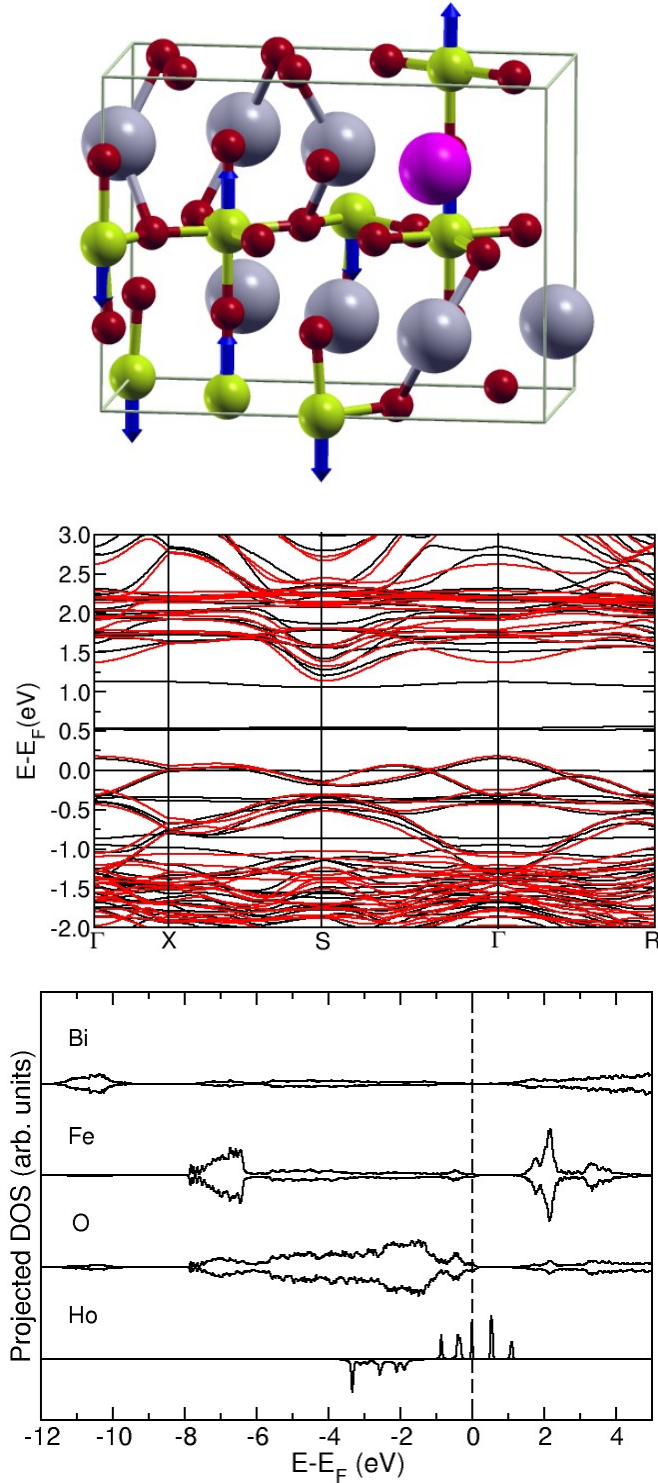

**Figure S15.** Electro-magnetic properties of the **T2-type AFM1** structure: a) Calculation cell with spin texture marked by the blue arrows; b) Band structure along lines between high symmetry points. Black lines present spin-up and red line spin-down bands; c) Element-resolved density of states (DOS). Mirrored graphs correspond to spin-up and spin-down states.



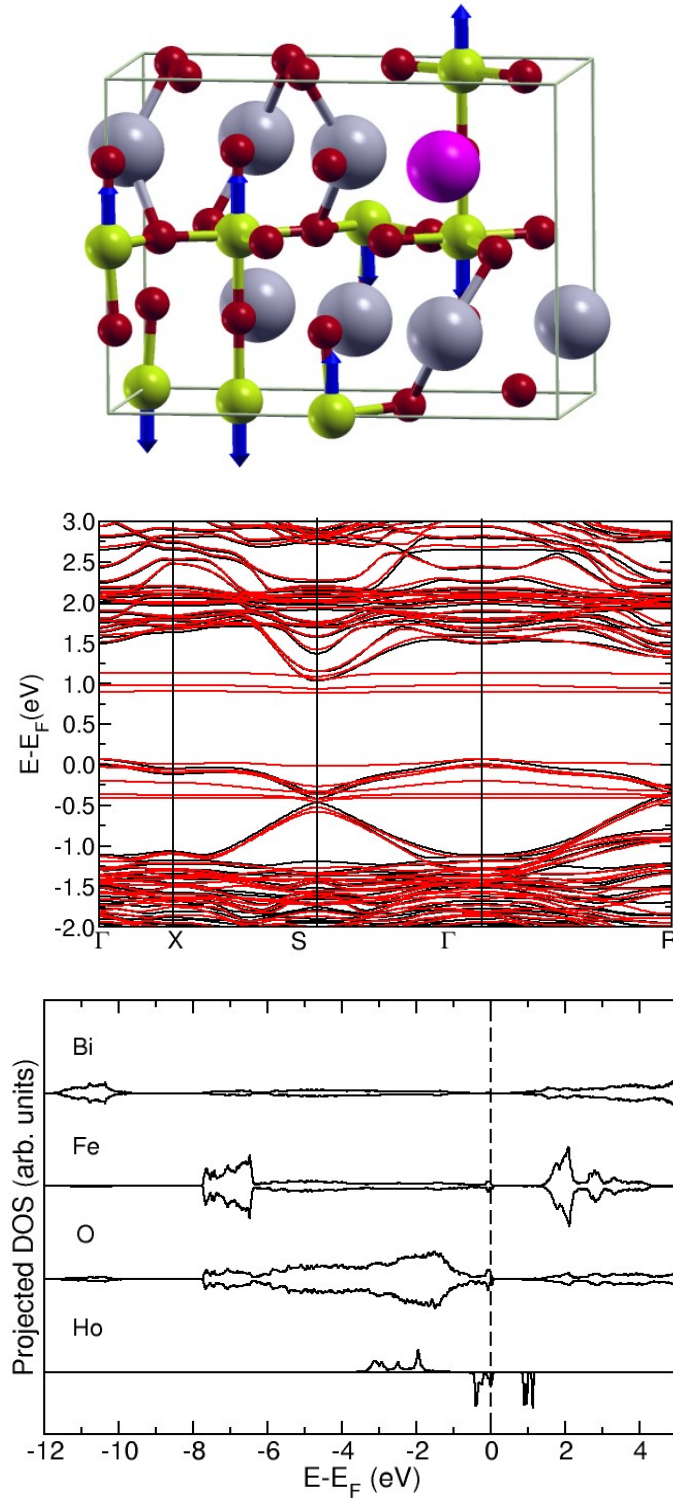

**Figure S16.** Electro-magnetic properties of the **T2-type AFM2** structure: a) Calculation cell with spin texture marked by the blue arrows; b) Band structure along lines between high symmetry points. Black lines present spin-up and red line spin-down bands; c) Element-resolved density of states (DOS). Mirrored graphs correspond to spin-up and spin-down states.
